# Supplementary material for: Influence of Obesity in Children with Supracondylar Humeral Fractures Requiring Surgical Treatment at a Tertiary Pediatric Trauma Center
Source: MDPI journal article supplement (doi:10.3390/healthcare11121783), 2023-06-16
Supplement: s1 [file s1]

Supplementary

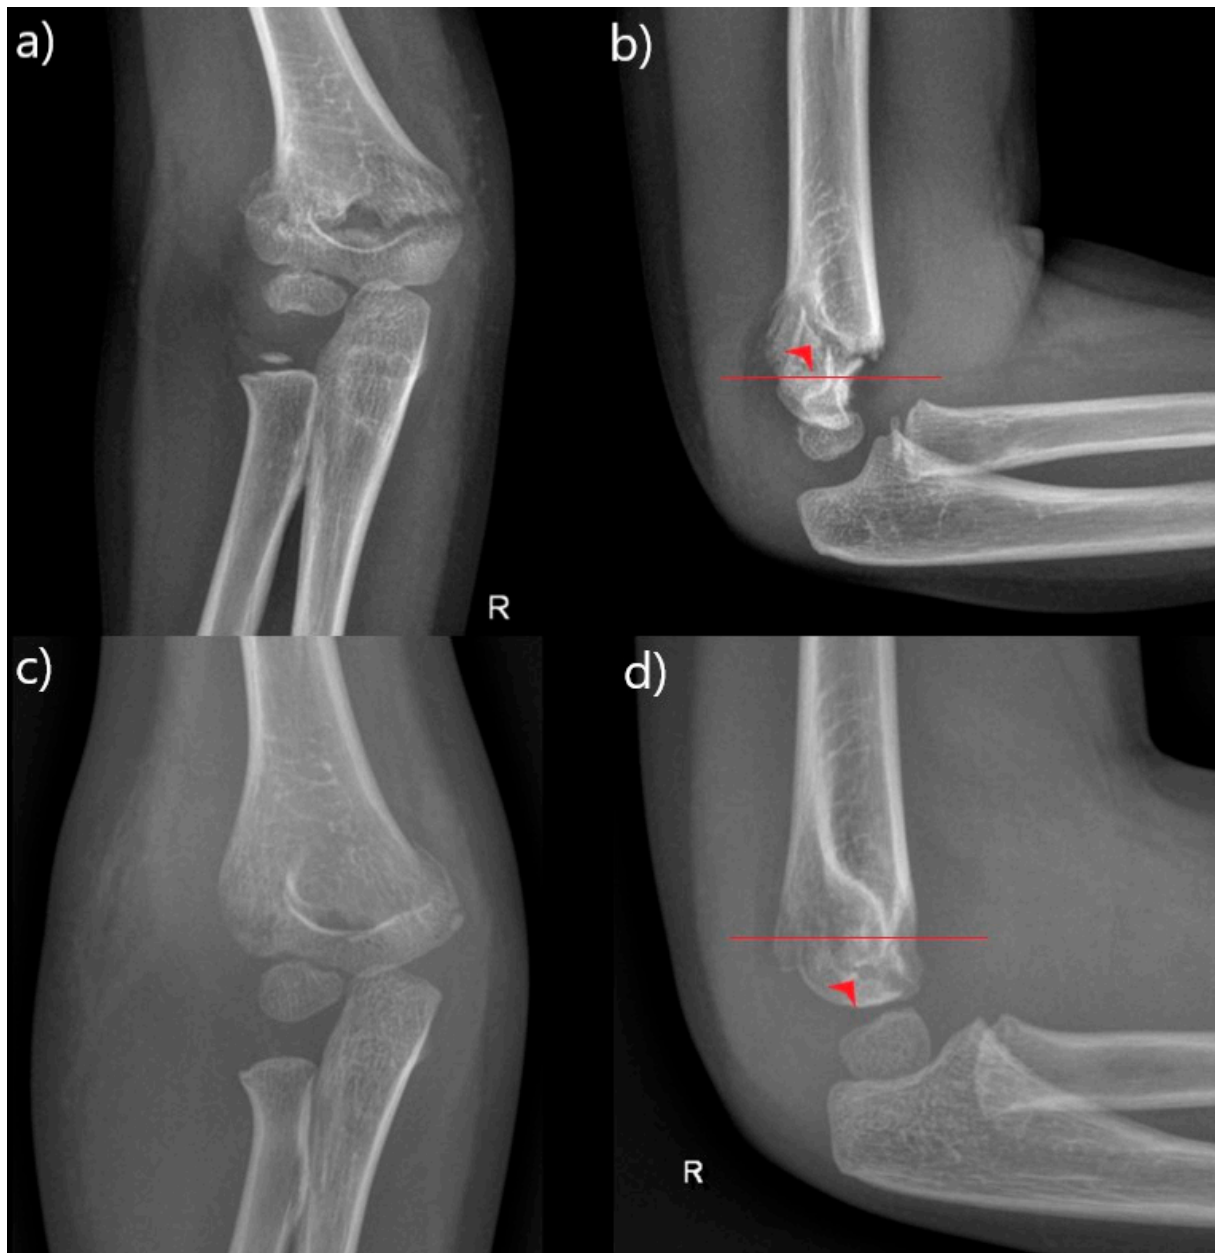

**Figure S1.** Anteroposterior and lateral x-rays of supracondylar fractures; (a,b) - high type of supracondylar fracture of the right humerus in a four-year-old boy; (c,d) - low type of supracondylar fracture of the right humerus in a five-year-old girl (red line - isthmus of the humerus, red arrow - fracture)
